# Supplementary material for: Nature’s Lab for Derivatization: New and Revised Structures of a Variety of Streptophenazines Produced by a Sponge-Derived Streptomyces Strain
Source: MDPI journal article supplement (doi:10.3390/md12041699), 2014-03-25

## Supplementary Information

**Figure S1.**  $^1\text{H}$  NMR of compound streptophenazine I (**1**) in  $\text{MeOD-}d_4$ .

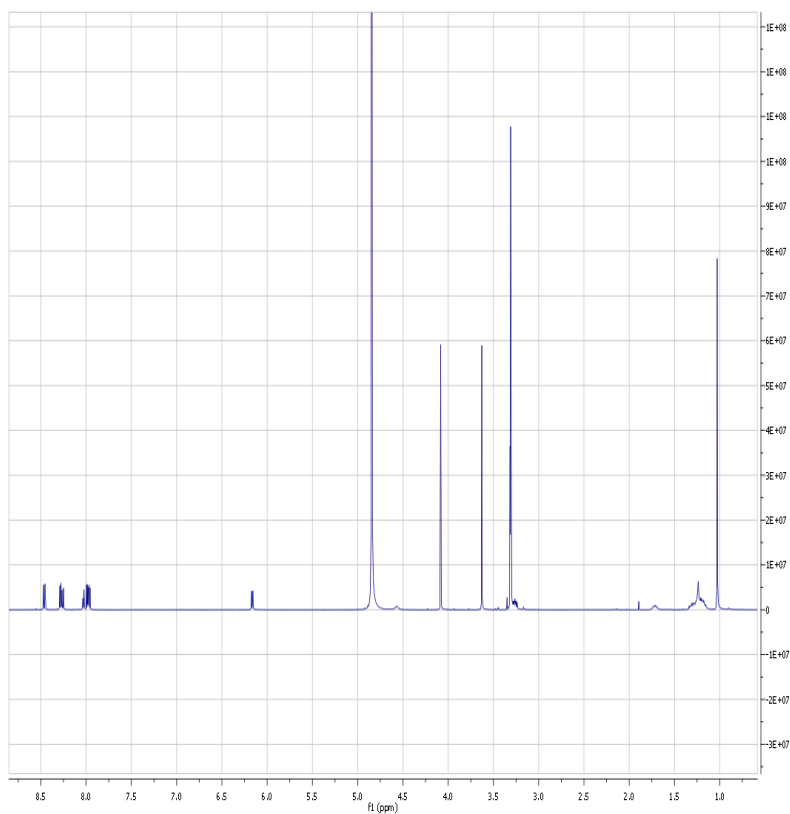

**Figure S2.** COSY of compound streptophenazine I (**1**) in  $\text{MeOD-}d_4$ .

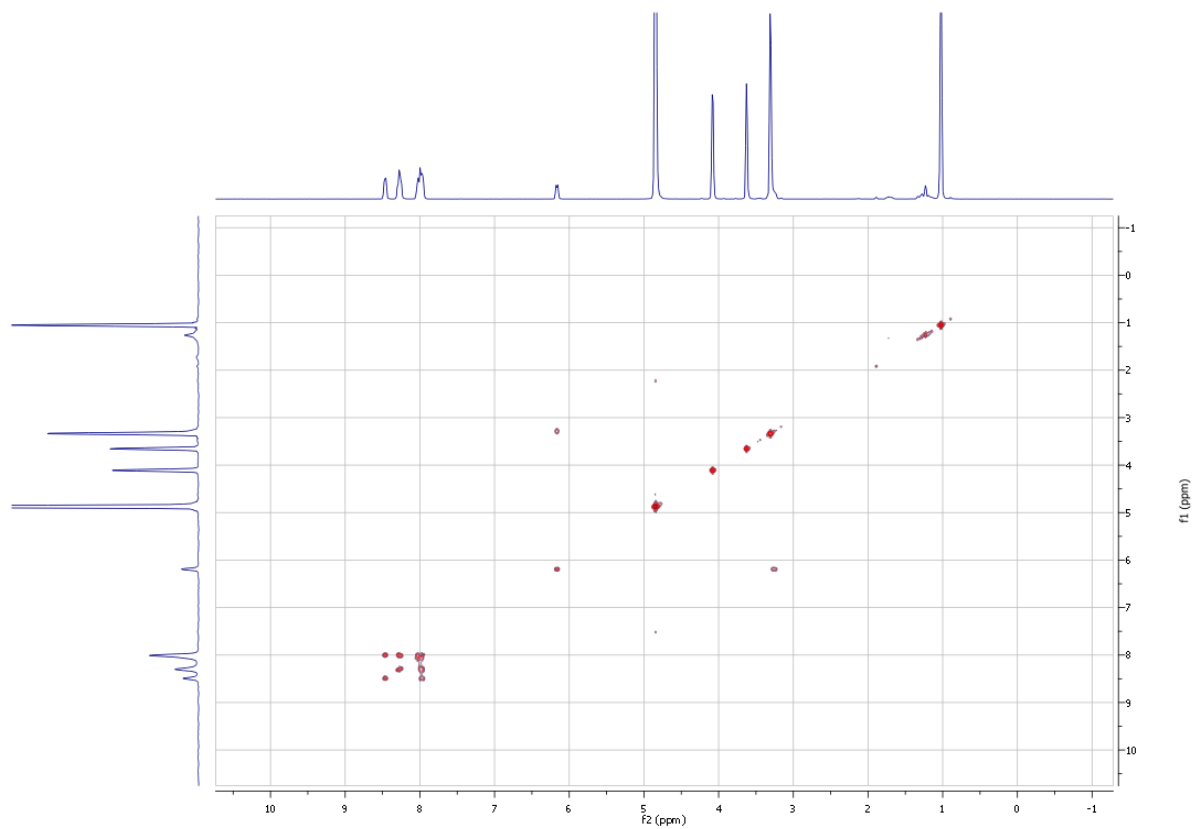

**Figure S3.**  $^{13}\text{C}$  NMR of compound streptophenazine I (1) in  $\text{MeOD-}d_4$ .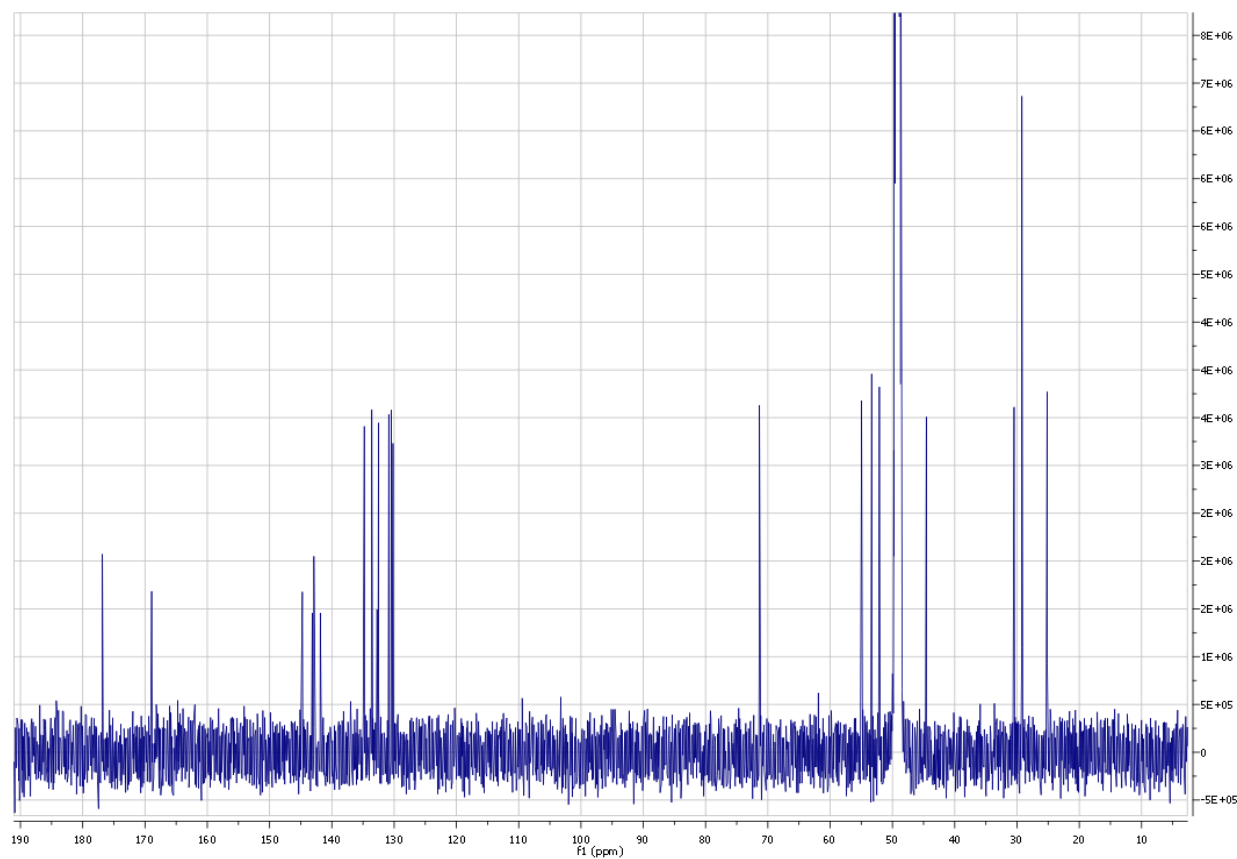**Figure S4.** DEPT of compound streptophenazine I (1) in  $\text{MeOD-}d_4$ .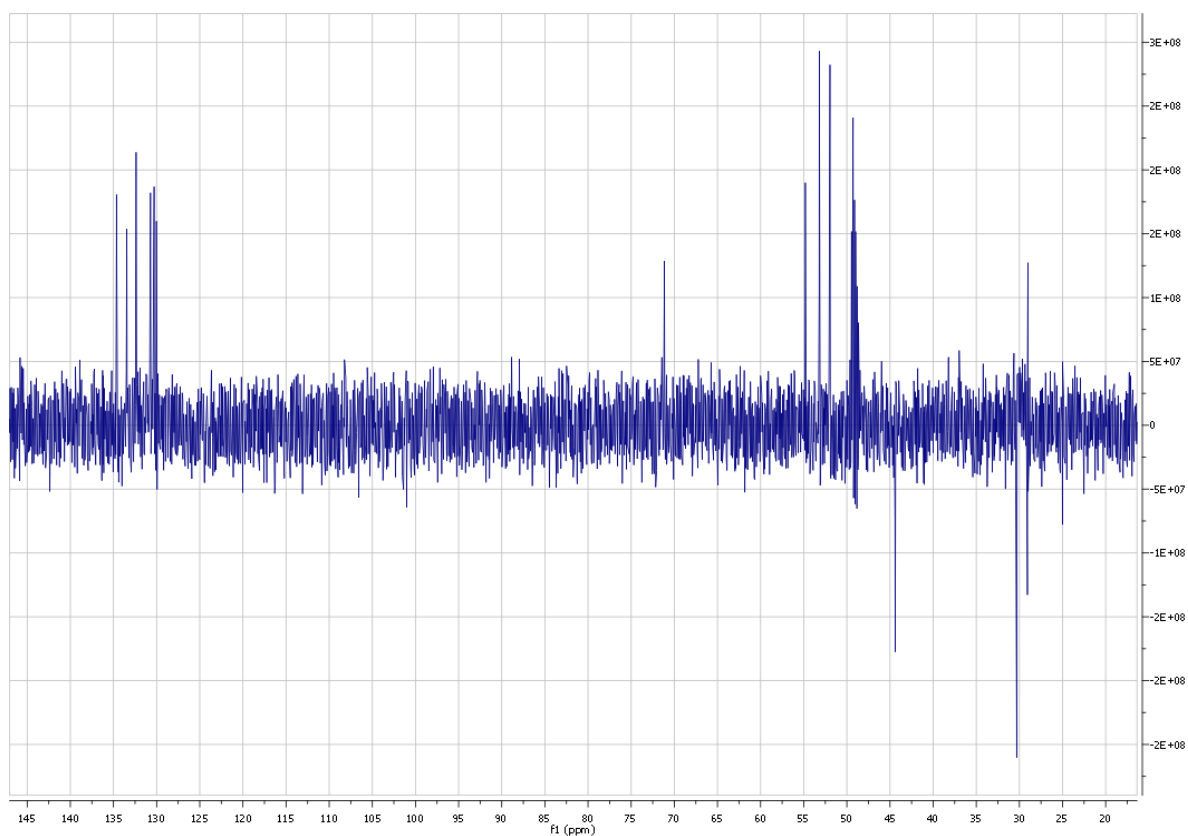

**Figure S5.** HSQC of compound streptophenazine I (1) in MeOD- $d_4$ .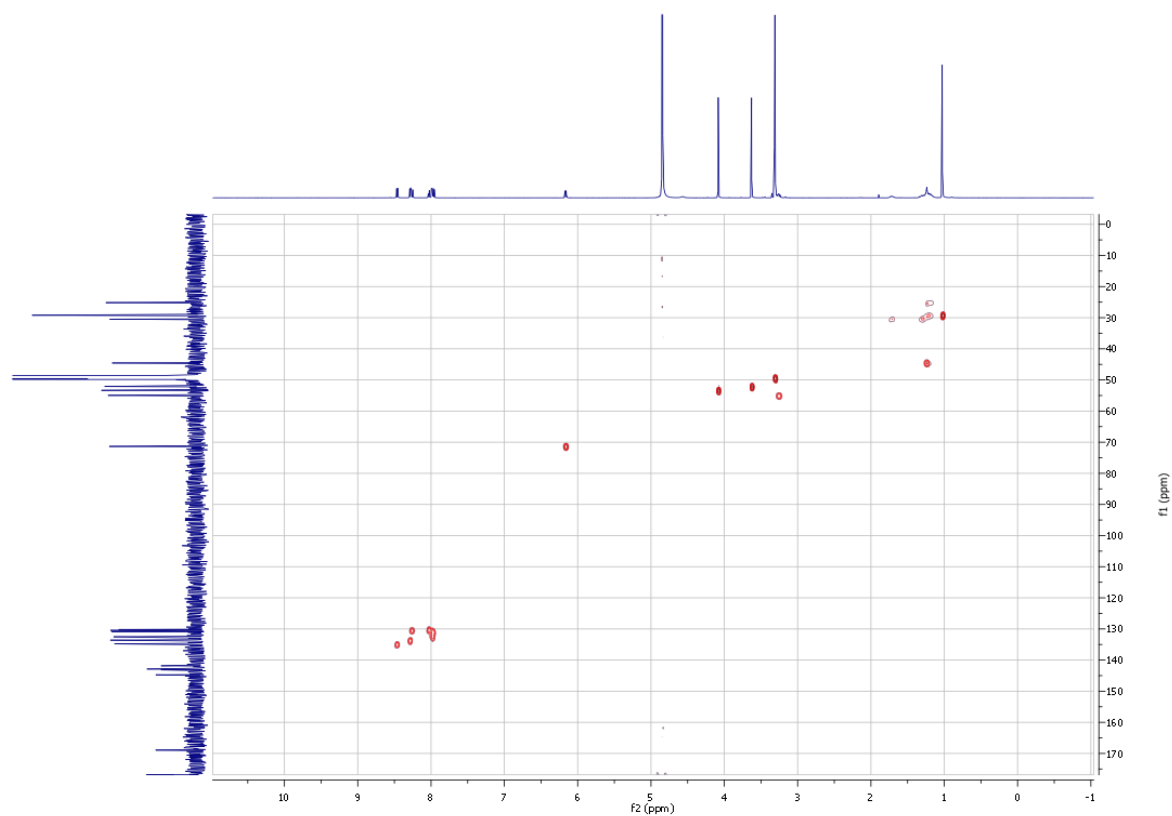**Figure S6.** HMBC of compound streptophenazine I (1) in MeOD- $d_4$ .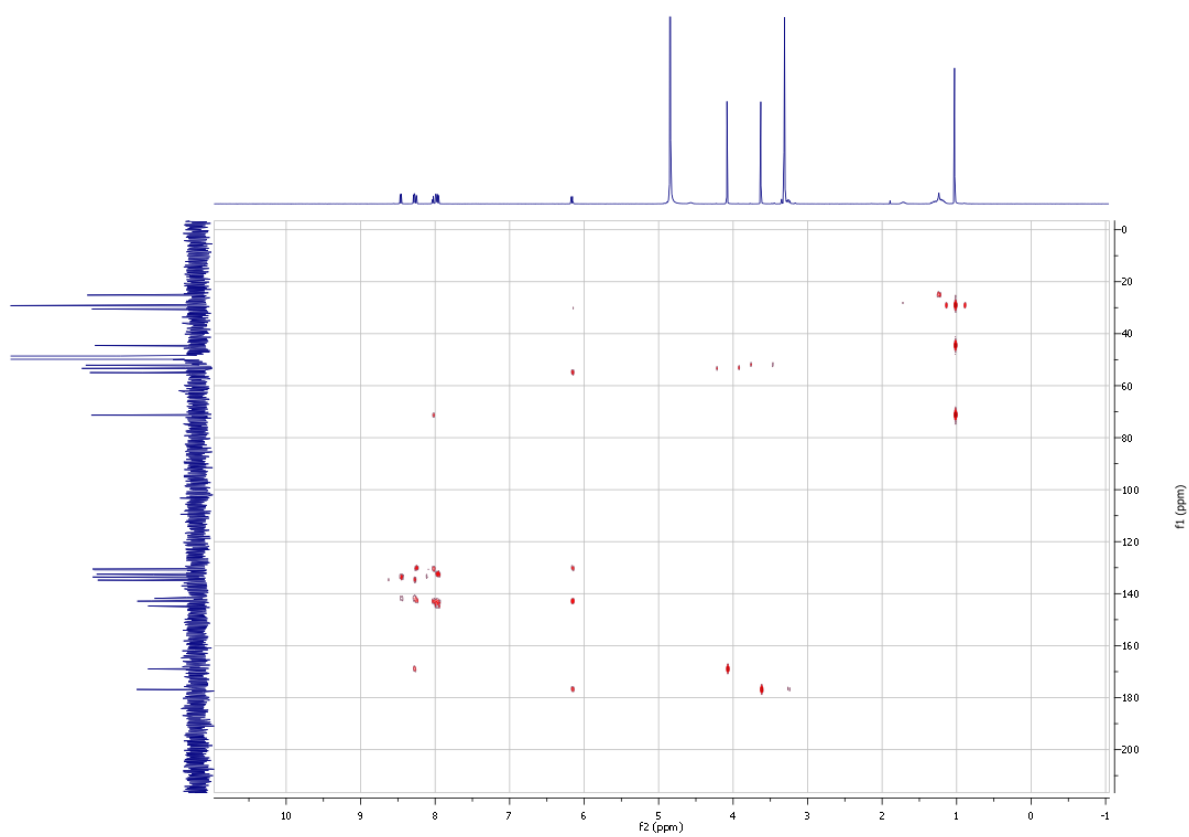

**Figure S7.**  $^1\text{H}$  NMR of compound streptophenazine J (**2**) in  $\text{MeOD-}d_4$ .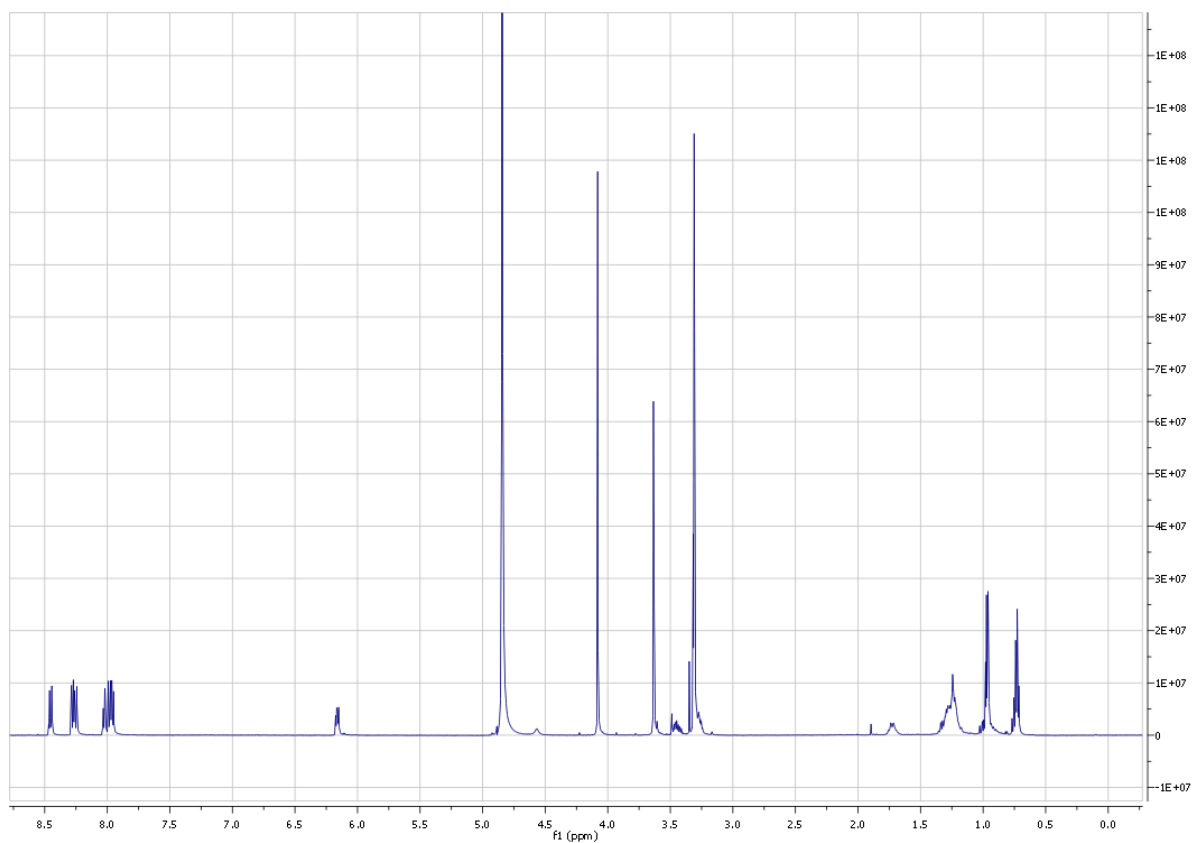**Figure S8.** COSY of compound streptophenazine J (**2**) in  $\text{MeOD-}d_4$ .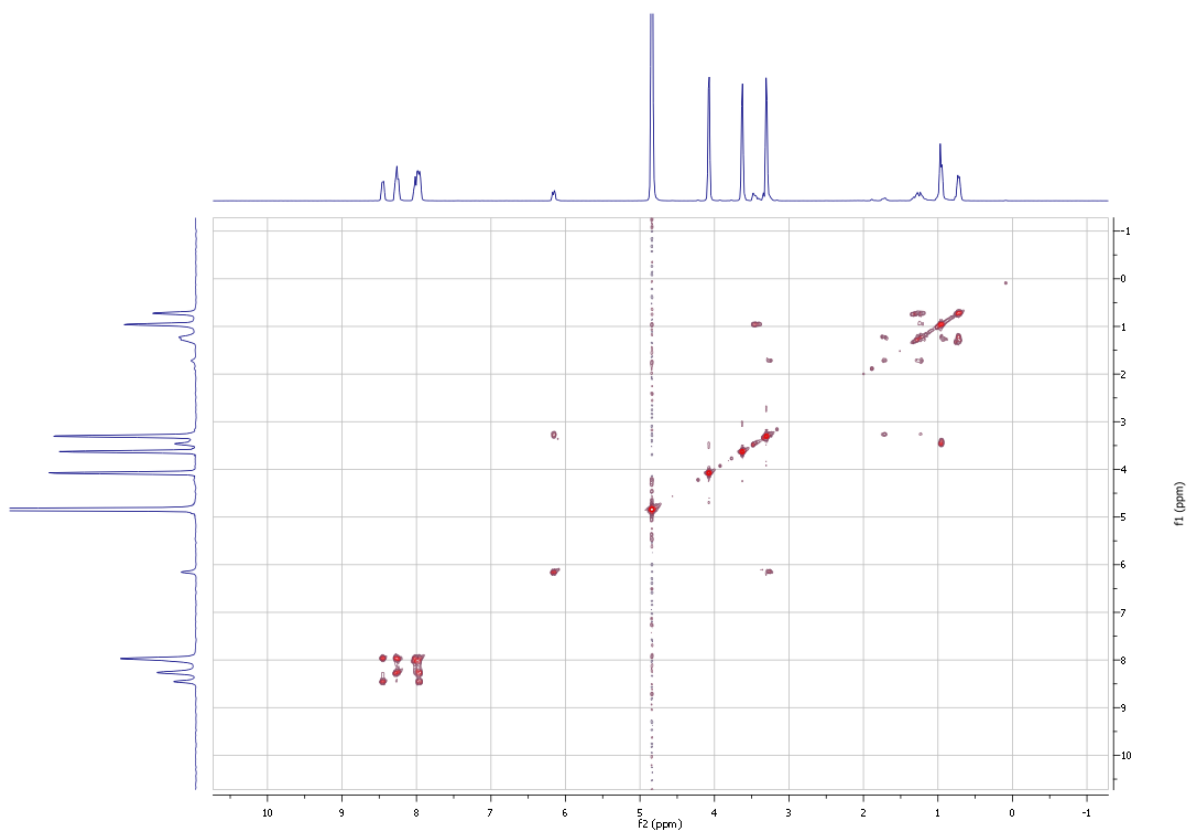

**Figure S9.**  $^{13}\text{C}$  NMR of compound streptophenazine J (2) in  $\text{MeOD-}d_4$ .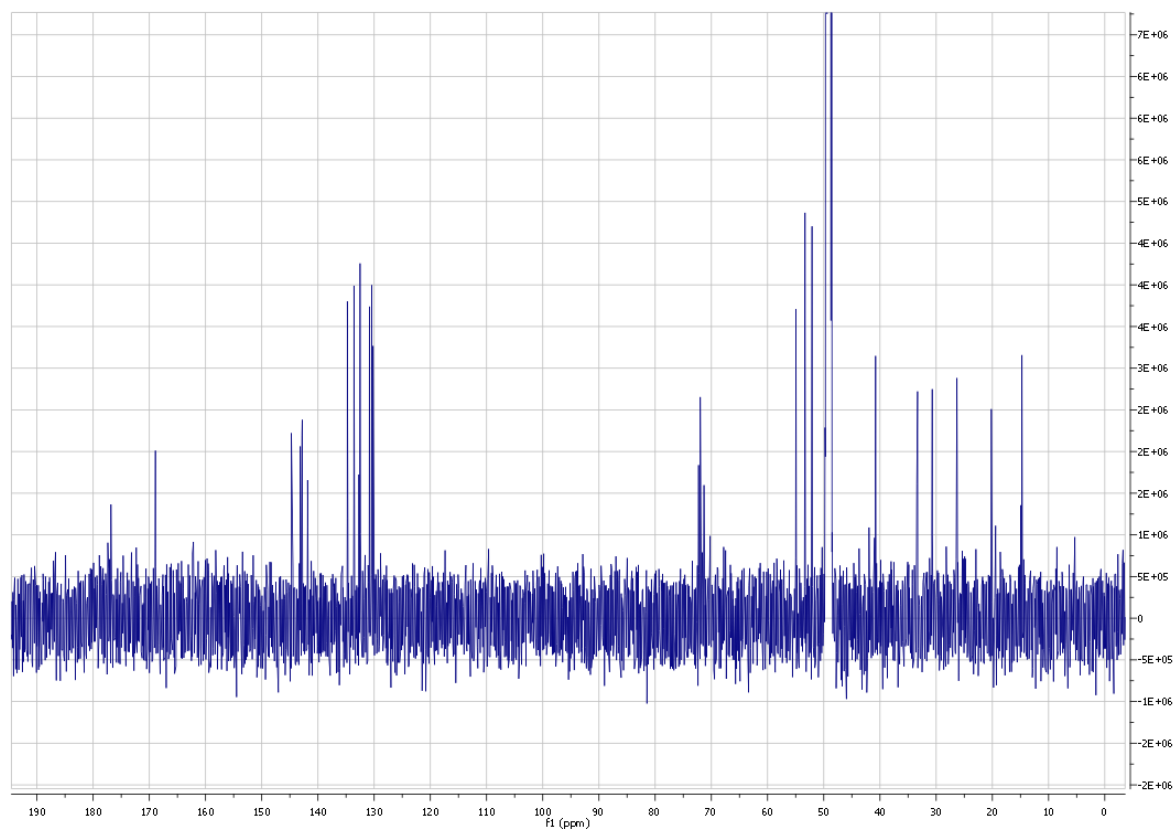**Figure S10.** DEPT of compound streptophenazine J (2) in  $\text{MeOD-}d_4$ .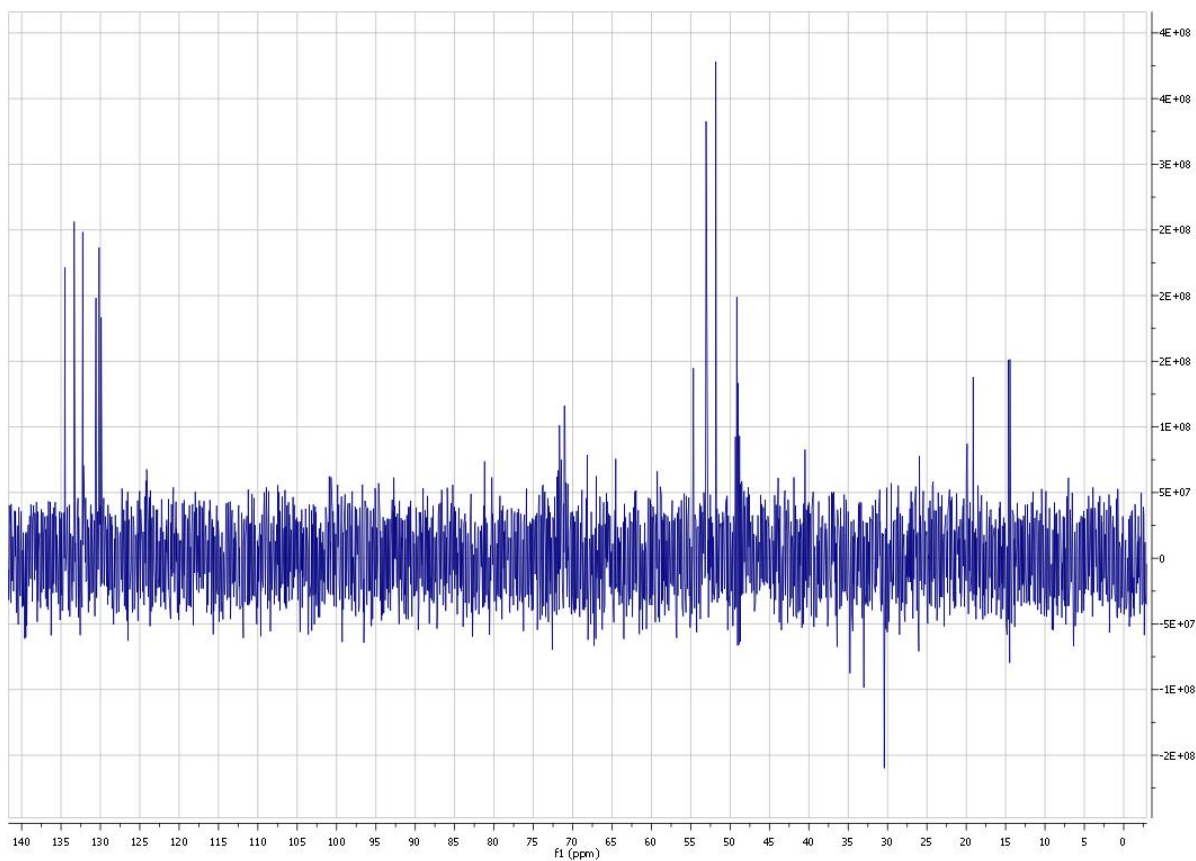

**Figure S11.** HSQC of compound streptophenazine J (2) in MeOD- $d_4$ .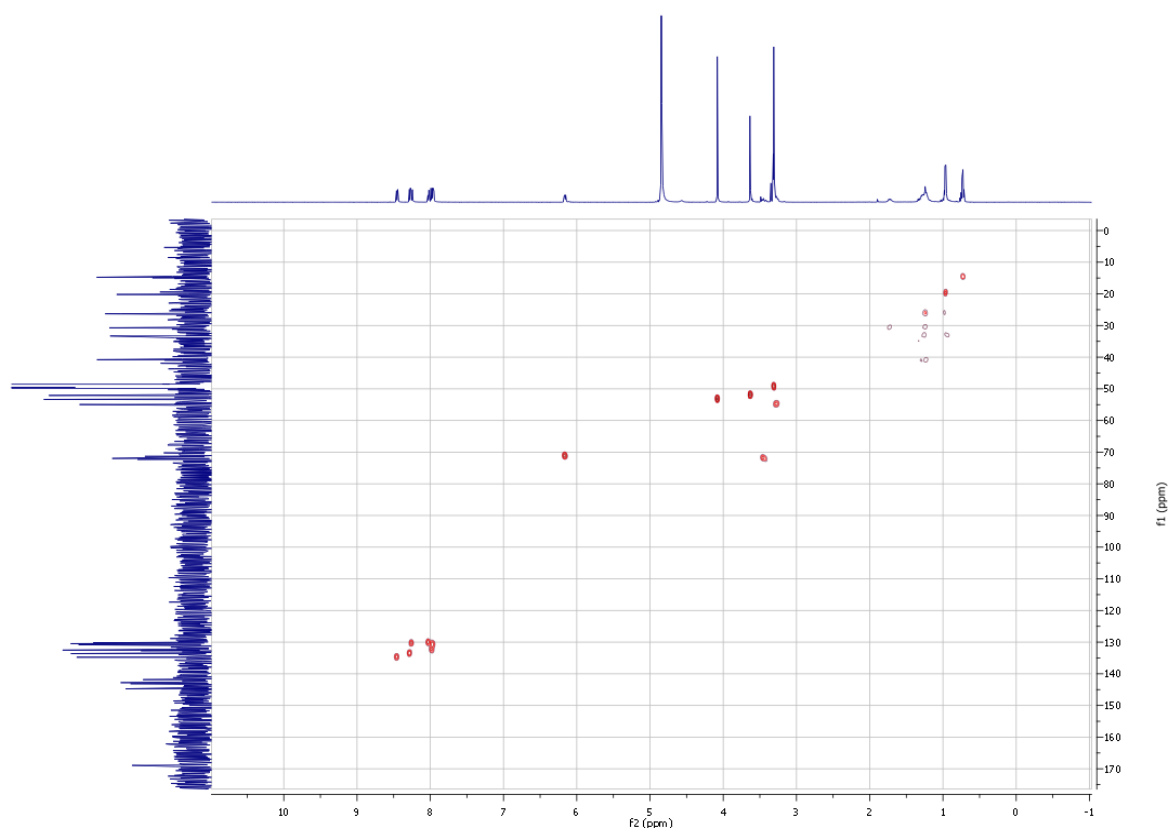**Figure S12.** HMBC of compound streptophenazine J (2) in MeOD- $d_4$ .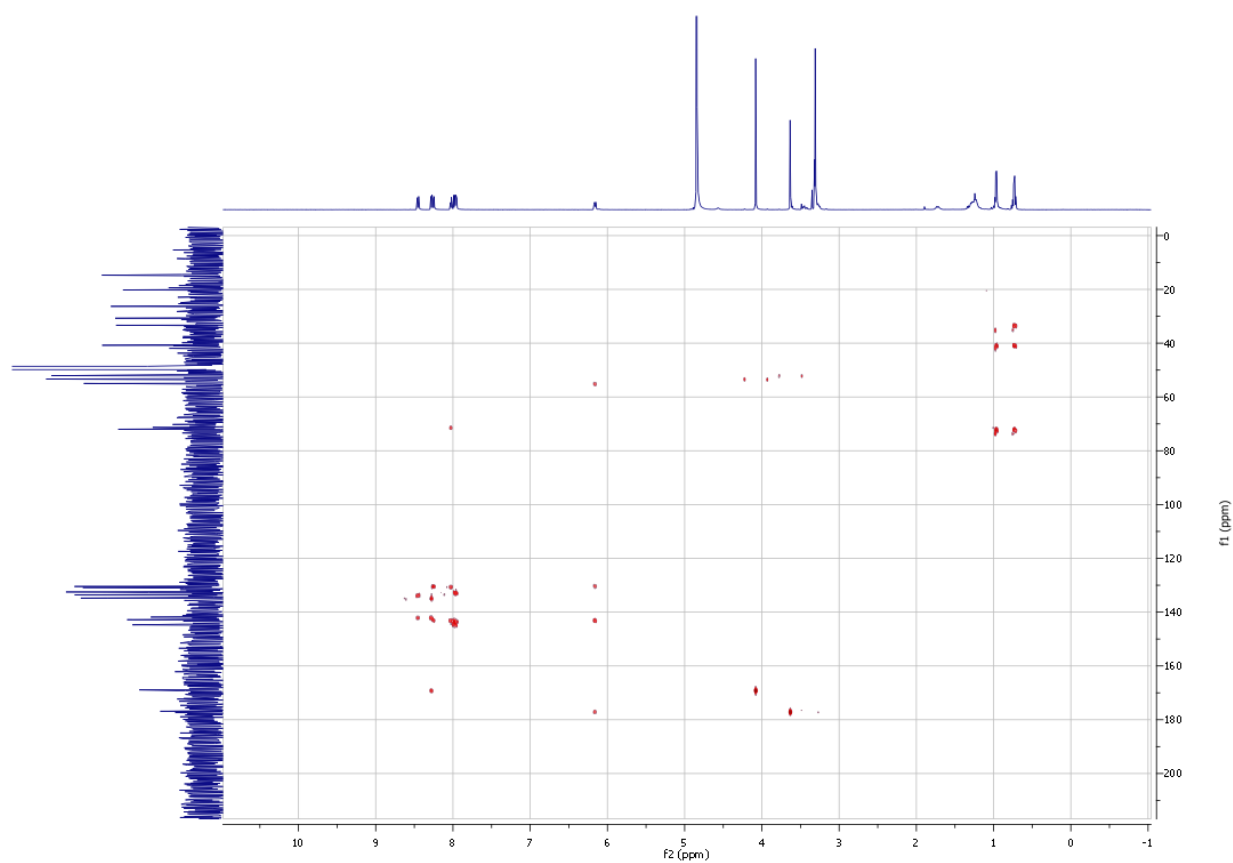

**Figure S13.**  $^1\text{H}$  NMR of compound streptophenazine K (**3**) in  $\text{MeOD-}d_4$ .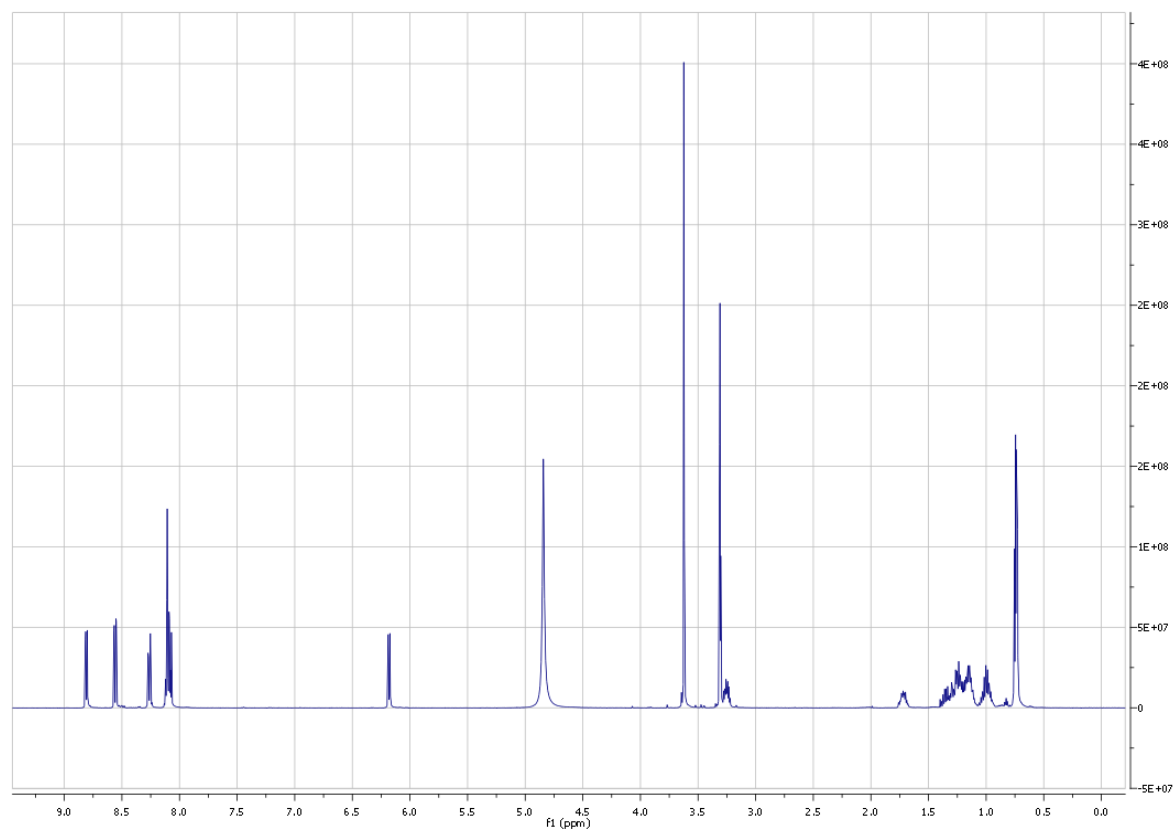**Figure S14.** COSY of compound streptophenazine K (**3**) in  $\text{MeOD-}d_4$ .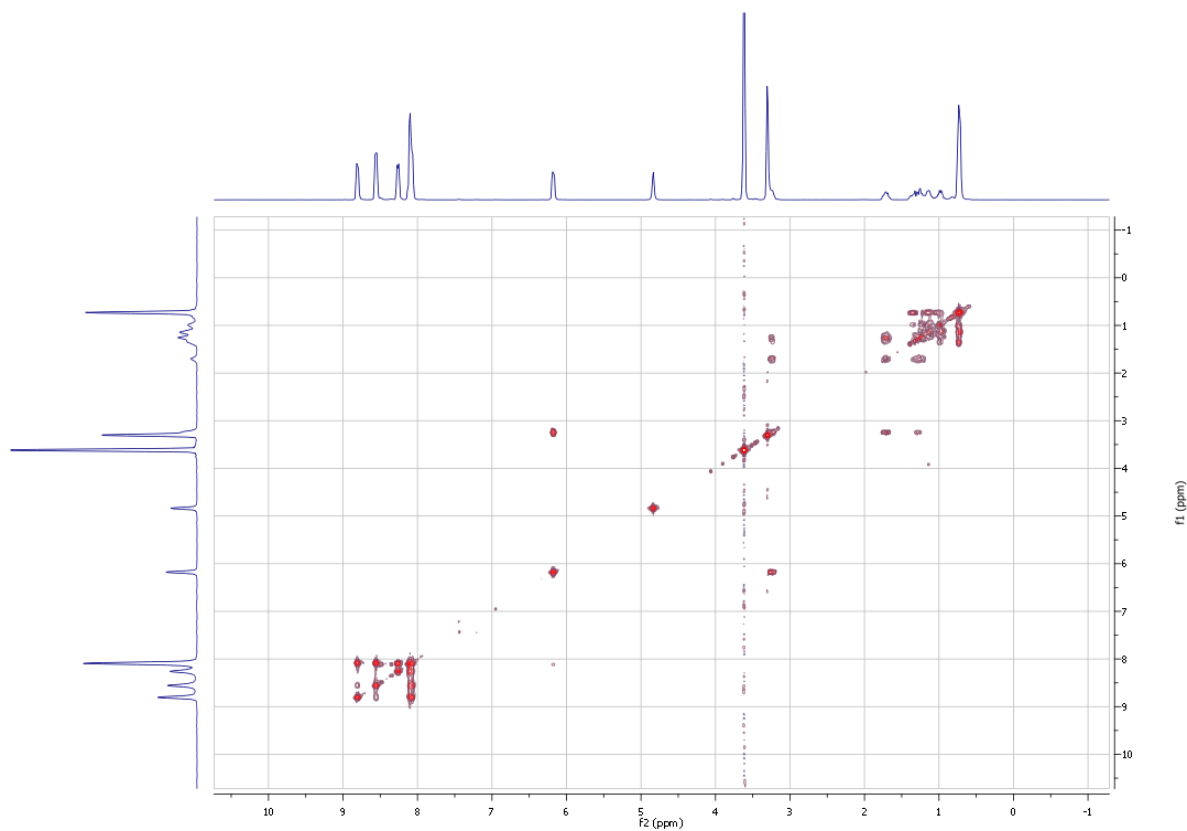

**Figure S15.**  $^{13}\text{C}$  NMR of compound streptophenazine K (3) in  $\text{MeOD-}d_4$ .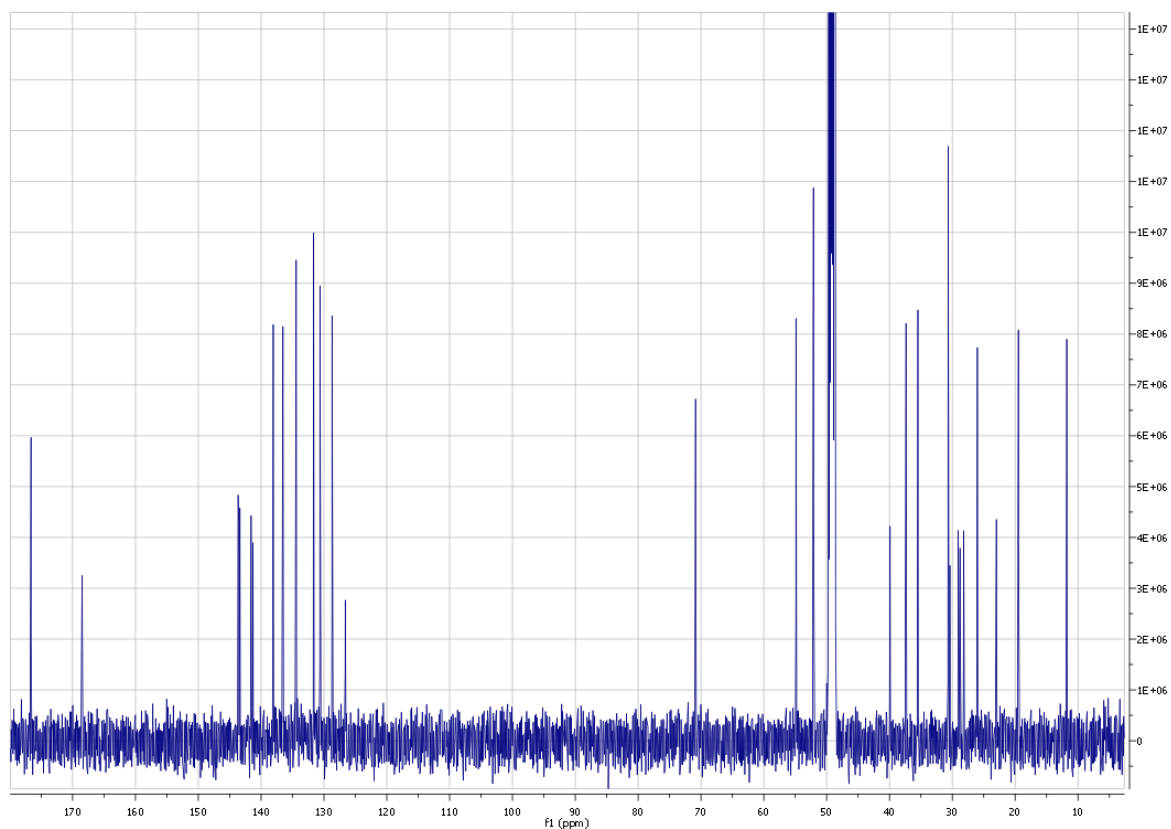**Figure S16.** DEPT of compound streptophenazine K (3) in  $\text{MeOD-}d_4$ .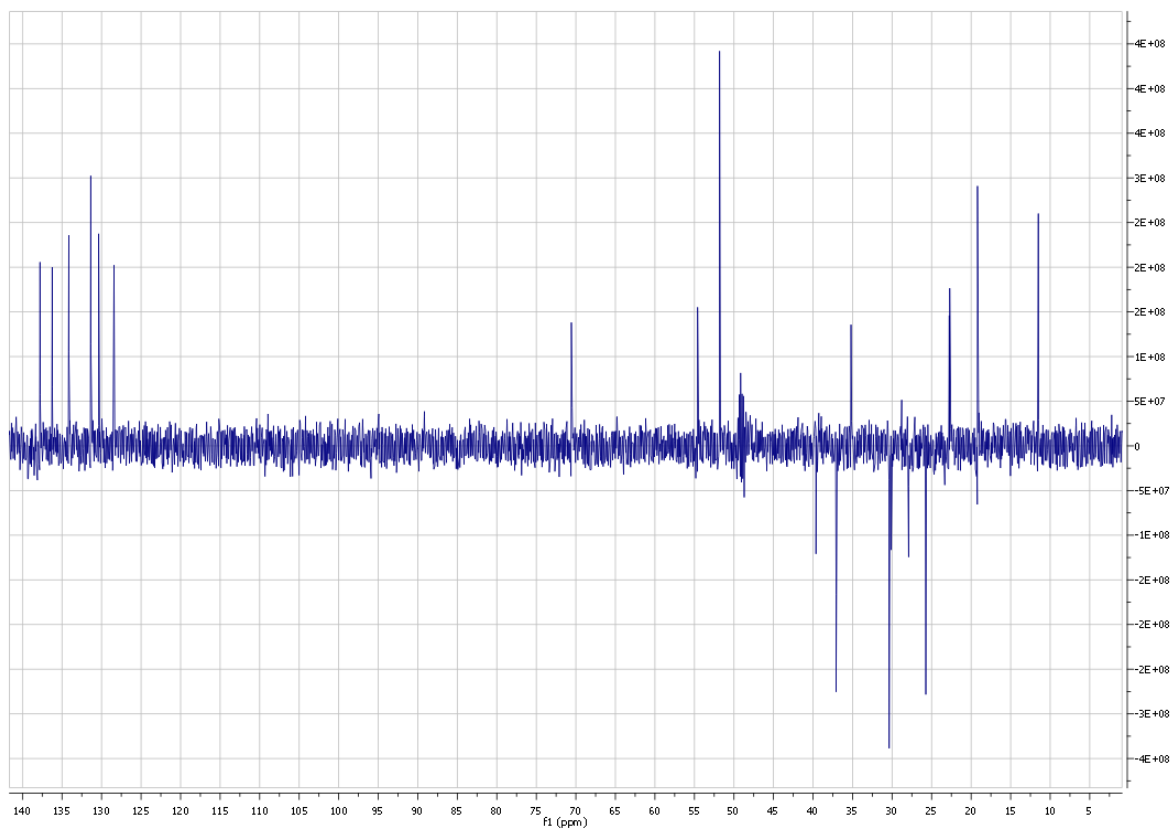



**Figure S17.** HSQC of compound streptophenazine K (**3**) in MeOD-*d*<sub>4</sub>.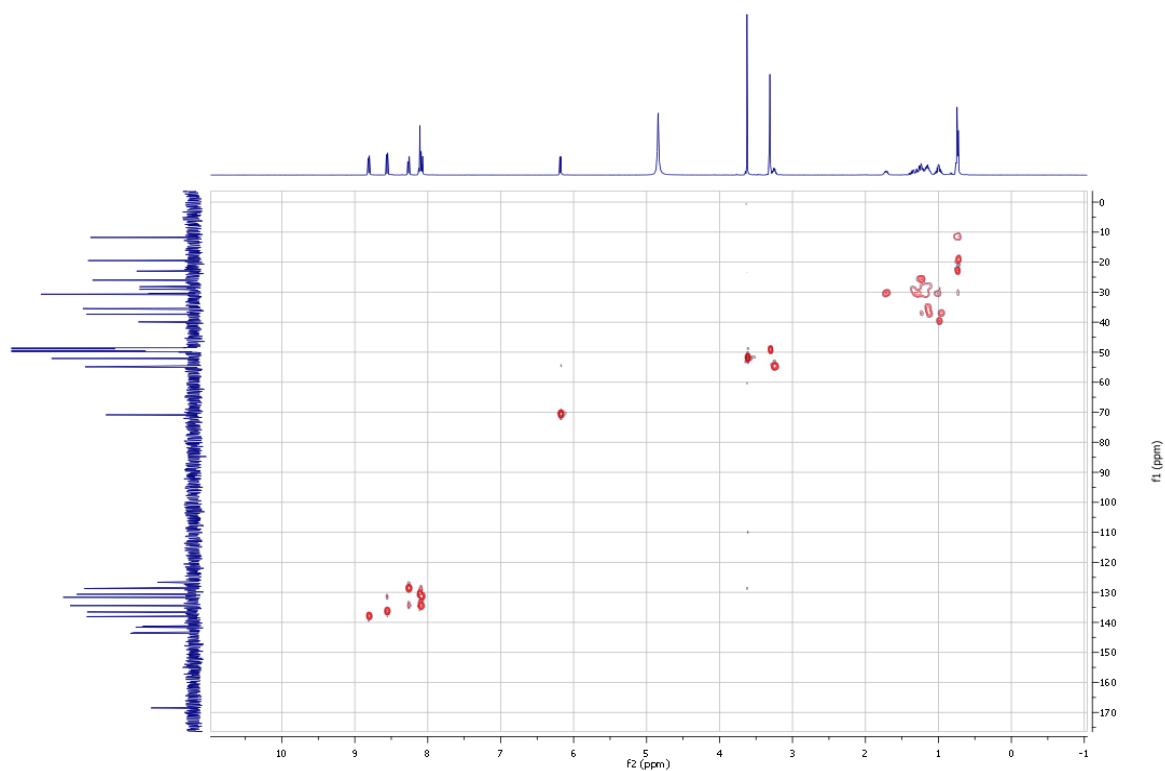**Figure S18.** HMBC of compound streptophenazine K (**3**) in MeOD-*d*<sub>4</sub>.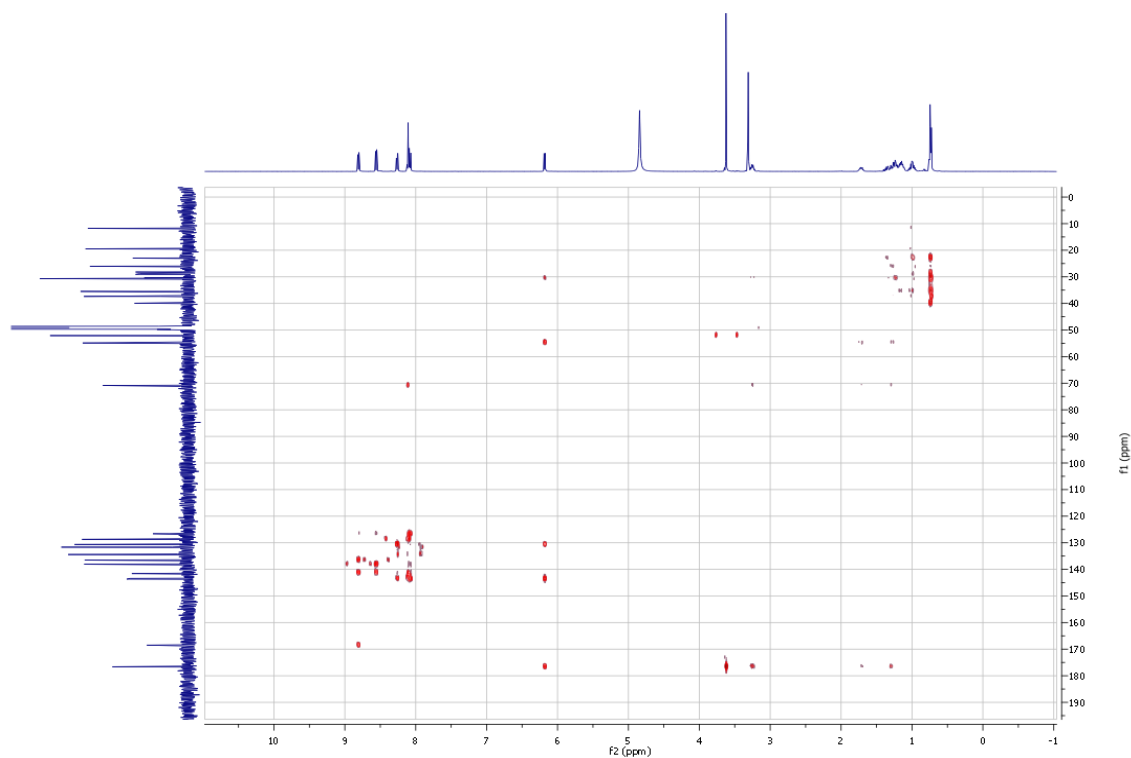

Supplement: s1 [file s1]
